# Supplementary material
Source: publisher site journal article supplement (https://www.spandidos-publications.com/4545/downloadSupplementary)
Supplement: Supplementary file 1 [file downloadSupplementary]

## Sheet: Sheet1
Table SIV. BM and non-BM group analysis.
A, Summary for BM group (n=26)					B, Gene summary for BM group (n=26)											C, Summary for Non-BM group (n=64)					D, Gene summary for Non-BM group (n=64)
ID	summary	Mean	Median		Hugo_Symbol	Frame_Shift_Del	Frame_Shift_Ins	In_Frame_Del	Missense_Mutation	Nonsense_Mutation	Splice_Site	total	MutatedSamples	AlteredSamples		ID	summary	Mean	Median		Hugo_Symbol	Frame_Shift_Del	Frame_Shift_Ins	In_Frame_Del	In_Frame_Ins	Missense_Mutation	Nonsense_Mutation	Splice_Site	total	MutatedSamples	AlteredSamples
NCBI_Build	NA	NA	NA		TP53	1	1	0	9	0	3	14	12	12		NCBI_Build	NA	NA	NA		TP53	1	1	3	0	20	5	6	36	33	33
Center	NA	NA	NA		EGFR	0	0	6	3	0	0	9	9	9		Center	NA	NA	NA		EGFR	0	0	8	2	12	0	0	22	21	21
Samples	23	NA	NA		CD3EAP	0	0	4	0	0	0	4	4	4		Samples	55	NA	NA		KRAS	0	0	0	0	8	0	0	8	8	8
nGenes	17	NA	NA		CTNNB1	0	0	0	4	0	0	4	4	4		nGenes	30	NA	NA		CD3EAP	0	0	7	0	0	0	0	7	7	7
Frame_Shift_Del	1	0.043	0		CYP2D6	0	0	0	0	0	2	2	2	2		Frame_Shift_Del	1	0.018	0		RB1	0	0	2	0	2	3	0	7	7	7
Frame_Shift_Ins	1	0.043	0		DPYD	0	0	0	2	0	0	2	2	2		Frame_Shift_Ins	1	0.018	0		PIK3CA	0	0	1	0	5	0	0	6	6	6
In_Frame_Del	10	0.435	0		TPMT	0	0	0	2	0	0	2	2	2		In_Frame_Del	22	0.4	0		APC	0	0	0	0	1	3	0	4	4	4
Missense_Mutation	29	1.261	1		ALK	0	0	0	1	0	0	1	1	1		In_Frame_Ins	3	0.055	0		CYP2D6	0	0	0	0	0	0	3	3	3	3
Nonsense_Mutation	1	0.043	0		APC	0	0	0	1	0	0	1	1	1		Missense_Mutation	78	1.418	1		DPYD	0	0	0	0	3	0	0	3	3	3
Splice_Site	5	0.217	0		CDA	0	0	0	1	0	0	1	1	1		Nonsense_Mutation	12	0.218	0		HRAS	0	0	0	0	3	0	0	3	3	3
total	47	2.043	1		KRAS	0	0	0	1	0	0	1	1	1		Splice_Site	10	0.182	0		ATM	0	0	0	0	1	1	0	2	2	2
					NRAS	0	0	0	1	0	0	1	1	1		total	127	2.309	2		CDKN2A	0	0	0	0	2	0	0	2	2	2
					RB1	0	0	0	0	1	0	1	1	1							CTNNB1	0	0	0	0	2	0	0	2	2	2
					SMAD4	0	0	0	1	0	0	1	1	1							ERBB4	0	0	0	0	2	0	0	2	2	2
					SOD2	0	0	0	1	0	0	1	1	1							FGFR3	0	0	0	0	2	0	0	2	2	2
					TERT	0	0	0	1	0	0	1	1	1							NTRK1	0	0	0	0	2	0	0	2	2	2
					VHL	0	0	0	1	0	0	1	1	1							OBSCN	0	0	1	0	1	0	0	2	2	2
																					PDGFRA	0	0	0	0	2	0	0	2	2	2
																					BRAF	0	0	0	0	1	0	0	1	1	1
																					ERBB2	0	0	0	1	0	0	0	1	1	1
																					FBXW7	0	0	0	0	1	0	0	1	1	1
																					IDH1	0	0	0	0	1	0	0	1	1	1
																					JAK2	0	0	0	0	1	0	0	1	1	1
																					KIT	0	0	0	0	0	0	1	1	1	1
																					MTOR	0	0	0	0	1	0	0	1	1	1
																					NRAS	0	0	0	0	1	0	0	1	1	1
																					SRC	0	0	0	0	1	0	0	1	1	1
																					TERT	0	0	0	0	1	0	0	1	1	1
																					TPMT	0	0	0	0	1	0	0	1	1	1
																					XRCC1	0	0	0	0	1	0	0	1	1	1
